# Supplementary material
Source: PubMed Central journal article supplement (PMC5376238)

Supplementary Figure 1 -Decarreau et al.

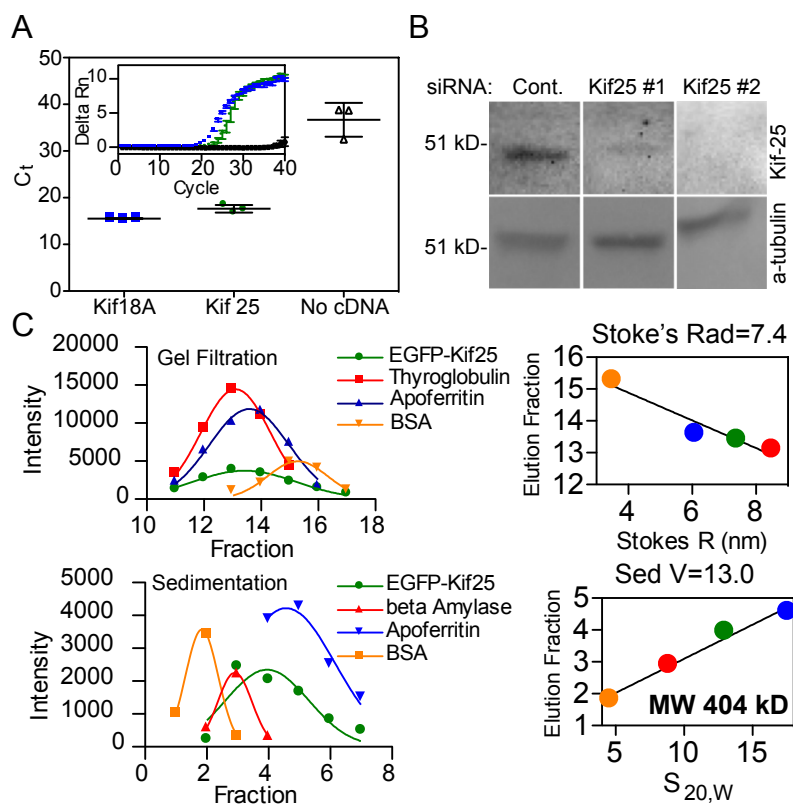

Supplement: NIHMS849667-supplement-supp_fig1.pdf [file NIHMS849667-supplement-supp_fig1.pdf]

Supplementary Figure 3 -Decarreau et al.  
 NCB-W27681C

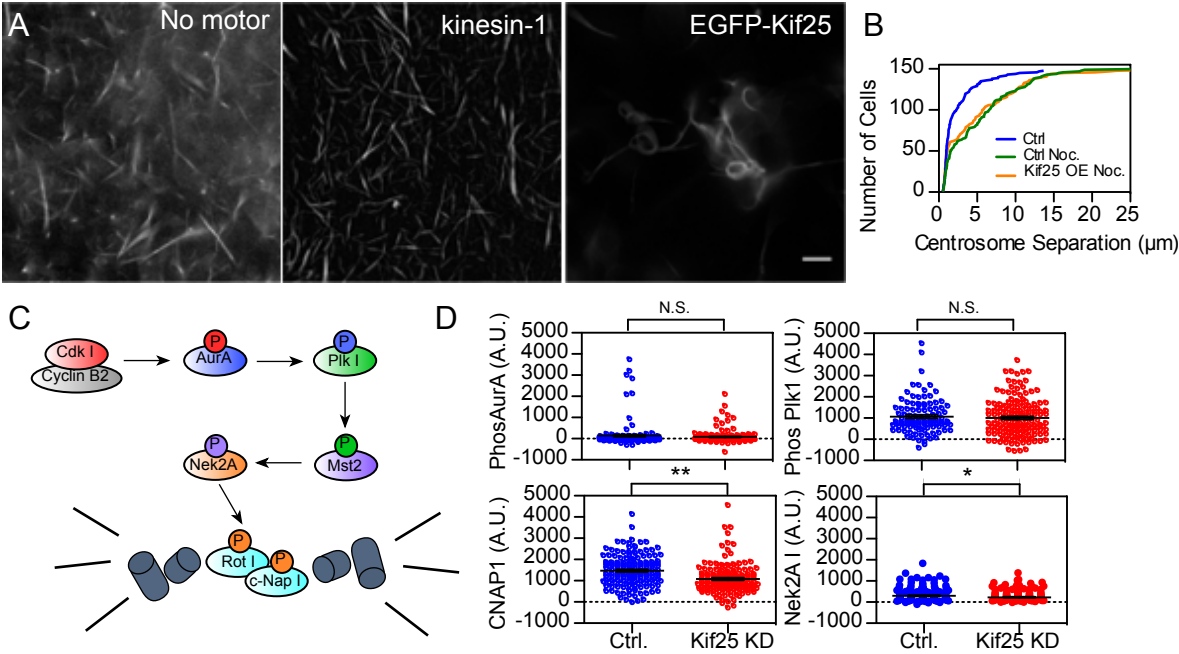

Supplement: NIHMS849667-supplement-supp_fig3.pdf [file NIHMS849667-supplement-supp_fig3.pdf]

Supplementary Figure 4 -Decarreau et al.

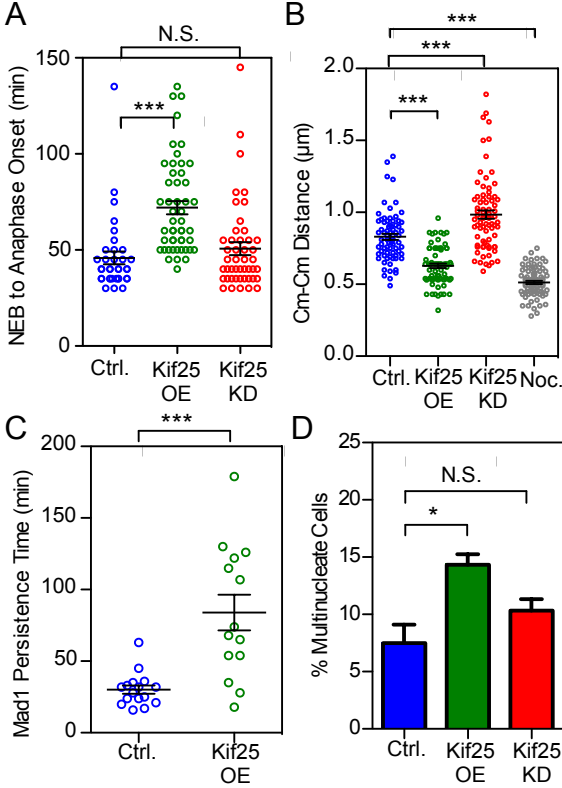

Supplement: NIHMS849667-supplement-supp_fig4.pdf [file NIHMS849667-supplement-supp_fig4.pdf]
